# Supplementary material
Source: HighWire-hosted journal article supplement (https://www.jrheum.org/highwire/filestream/38268/field_highwire_adjunct_files/0/190282DataSuppl.pdf)
Supplement: 190282DataSuppl.pdf [file 190282DataSuppl.pdf]

## ONLINE SUPPLEMENTARY DATA

**Supplementary Table S1.** TCZ dose at 6 and 12 months after initiation of TCZ in patients with low vs high comorbidity burden.

| Outcome                                              | All Initiators<br>[N = 770] | Low Burden<br>(mCCI < 2)<br>[n = 575] | High Burden<br>(mCCI ≥ 2)<br>[n = 195] |
|------------------------------------------------------|-----------------------------|---------------------------------------|----------------------------------------|
| All IV TCZ initiators, n (%) <sup>*</sup>            | 706 (93.8)                  | 528 (93.6)                            | 178 (94.2)                             |
| All SC TCZ initiators, n (%) <sup>*</sup>            | 47 (6.2)                    | 36 (6.4)                              | 11 (5.8)                               |
| Dose available at initiation, n                      | 437                         | 342                                   | 95                                     |
| Initiated IV TCZ with dose available, n              | 407                         | 316                                   | 91                                     |
| Initiated IV TCZ 4 mg/kg, n                          | 230                         | 172                                   | 58                                     |
| Dose available at 6 months, n (%) <sup>†</sup>       | 168 (73.0)                  | 124 (72.1)                            | 44 (75.9)                              |
| Increase to 8 mg/kg by 6 months, n (%) <sup>†</sup>  | 107 (46.5)                  | 81 (47.1)                             | 26 (44.8)                              |
| Dose available at 12 months, n (%) <sup>†</sup>      | 146 (63.5)                  | 107 (62.2)                            | 39 (67.2)                              |
| Increase to 8 mg/kg by 12 months, n (%) <sup>†</sup> | 117 (50.9)                  | 89 (51.7)                             | 28 (48.3)                              |
| Initiated IV TCZ 8 mg/kg, n                          | 177                         | 144                                   | 33                                     |
| Initiated SC TCZ with dose available, n              | 30                          | 26                                    | 4                                      |
| Initiated SC TCZ q2w, n                              | 13                          | 10                                    | 3                                      |
| Dose available at 6 months, n (%) <sup>‡</sup>       | 7 (53.8)                    | 6 (60.0)                              | 1 (33.3)                               |
| Increase to qw by 6 months, n (%) <sup>‡</sup>       | 1 (7.7)                     | 0                                     | 1 (33.3)                               |
| Dose available at 12 months, n (%) <sup>‡</sup>      | 9 (69.2)                    | 7 (70.0)                              | 1 (33.3)                               |
| Increase to qw by 12 months, n (%) <sup>‡</sup>      | 0                           | 0                                     | 0                                      |
| Initiated SC TCZ qw, n                               | 17                          | 16                                    | 1                                      |
| Receiving TCZ at 6 months, n (%) <sup>§</sup>        | 579 (75.2)                  | 434 (75.5)                            | 145 (74.4)                             |
| Receiving IV TCZ with dose available, n              | 488                         | 364                                   | 124                                    |
| Receiving IV TCZ 4 mg/kg, n (%) <sup>  </sup>        | 114 (23.3)                  | 86 (23.6)                             | 28 (22.6)                              |
| Receiving IV TCZ 8 mg/kg, n (%) <sup>  </sup>        | 374 (76.6)                  | 278 (76.4)                            | 96 (77.4)                              |
| Receiving SC TCZ with dose available, n              | 40                          | 34                                    | 6                                      |
| Receiving SC TCZ q2w, n (%) <sup>  </sup>            | 20 (50.0)                   | 16 (47.1)                             | 4 (66.7)                               |
| Receiving SC TCZ qw, n (%) <sup>  </sup>             | 20 (50.0)                   | 18 (52.9)                             | 2 (33.3)                               |
| Receiving TCZ at 12 months, n (%) <sup>§</sup>       | 475 (61.7)                  | 353 (61.4)                            | 122 (62.6)                             |
| Receiving IV TCZ with dose available, n              | 412                         | 306                                   | 106                                    |
| Receiving IV TCZ 4 mg/kg, n (%) <sup>  </sup>        | 69 (16.8)                   | 49 (16.0)                             | 20 (18.9)                              |
| Receiving IV TCZ 8 mg/kg, n (%) <sup>  </sup>        | 343 (83.2)                  | 257 (84.0)                            | 86 (81.1)                              |
| Receiving SC TCZ with dose available, n              | 32                          | 25                                    | 7                                      |
| Receiving SC TCZ q2w, n (%) <sup>  </sup>            | 19 (59.4)                   | 14 (56.0)                             | 5 (71.4)                               |
| Receiving SC TCZ qw, n (%) <sup>  </sup>             | 13 (40.6)                   | 11 (44.0)                             | 2 (28.6)                               |

IV, intravenous; mCCI, modified Charlson Comorbidity Index; SC, subcutaneous; TCZ, tocilizumab; qw, every week; q2w, every 2 weeks.

<sup>\*</sup> Of patients with available IV/SC information.

<sup>†</sup> Of patients who received IV TCZ 4 mg/kg at initiation.

<sup>‡</sup> Of patients who received SC TCZ q2w at initiation.

<sup>§</sup> Of all patients.

|| Of patients with available dose information.

**Supplementary Table S2.** Distribution of comorbidities included in the mCCI\* among patients with mCCI score available at TCZ initiation

| Comorbidity                         | All TCZ Initiators With mCCI Score (N = 770) | Low Comorbidity Burden (mCCI < 2) [n = 575] | High Comorbidity Burden (mCCI ≥ 2) [n = 195] | Nonobese (BMI < 30) [n = 427] | Obese (BMI ≥ 30) [n = 343] |
|-------------------------------------|----------------------------------------------|---------------------------------------------|----------------------------------------------|-------------------------------|----------------------------|
| Connective tissue disease†          | 195 (100)                                    | 575 (100)                                   | 195 (100)                                    | 427 (100)                     | 343 (100)                  |
| Diabetes mellitus                   | 83 (10.8)                                    | 0                                           | 83 (42.6)                                    | 25 (5.6)                      | 58 (16.3)                  |
| Solid tumor cancer (excluding NMSC) | 41 (5.3)                                     | 0                                           | 41 (21.0)                                    | 23 (5.2)                      | 18 (5.)                    |
| Liver disease                       | 40 (5.2)                                     | 0                                           | 40 (20.5)                                    | 23 (5.1)                      | 17 (4.8)                   |
| COPD                                | 20 (2.6)                                     | 0                                           | 20 (10.3)                                    | 12 (2.7)                      | 8 (2.2)                    |
| Myocardial infarction               | 14 (1.8)                                     | 0                                           | 14 (7.2)                                     | 7 (1.6)                       | 7 (2.0)                    |
| Stroke                              | 14 (1.8)                                     | 0                                           | 14 (7.2)                                     | 7 (1.6)                       | 7 (2.0)                    |
| Congestive heart failure            | 9 (1.2)                                      | 0                                           | 9 (4.6)                                      | 4 (0.9)                       | 5 (1.4)                    |
| TIA                                 | 6 (0.8)                                      | 0                                           | 6 (3.1)                                      | 2 (0.4)                       | 4 (1.1)                    |
| Lymphoma                            | 4 (0.5)                                      | 0                                           | 4 (2.1)                                      | 4 (0.9)                       | 0                          |
| Peptic ulcer disease                | 4 (0.5)                                      | 0                                           | 4 (2.1)                                      | 2 (0.4)                       | 2 (0.6)                    |
| Peripheral vascular disease         | 1 (0.1)                                      | 0                                           | 1 (0.5)                                      | 1 (0.2)                       | 0                          |
| Leukemia                            | 0                                            | 0                                           | 0                                            | 0                             | 0                          |

BMI, body mass index; COPD, chronic obstructive pulmonary disease; mCCI, modified Charlson Comorbidity Index; NMSC, nonmelanoma skin cancer; TCZ, tocilizumab; TIA, transient ischemic attack.

\* The mCCI was calculated as the sum of prior (history of) physician-reported comorbid conditions included in the CCI that are captured in the Corrona registry, excluding the few conditions that are not captured (dementia, kidney disease, hemiplegia and AIDS).

† Connective tissue disease was coded as “1” for all patients because the population was limited to patients with RA.

**Supplementary Table S3.** Distribution of mCCI by level in patients with low vs high comorbidity burden.

| <b>mCCI Level</b> | <b>All Initiators<br/>[N = 770]</b> |
|-------------------|-------------------------------------|
| Low mCCI, n (%)*  |                                     |
| 1                 | 575 (74.7)                          |
| High mCCI, n (%)* |                                     |
| 2                 | 153 (19.9)                          |
| 3                 | 34 (4.4)                            |
| 4                 | 3 (0.4)                             |
| 5                 | 5 (0.6)                             |

mCCI, modified Charlson Comorbidity Index.

\* Percentage of all initiators (n = 770).

**Supplementary Table S4.** Distribution of weight of nonobese vs obese patients.\*

| Weight          | All Initiators | Nonobese (BMI < 30)<br>[n = 449] |                          |                                       |                                  | Obese (BMI ≥ 30)<br>[n = 356] |                                     |                                  |
|-----------------|----------------|----------------------------------|--------------------------|---------------------------------------|----------------------------------|-------------------------------|-------------------------------------|----------------------------------|
|                 |                | All Nonobese (BMI < 30)          | Underweight (BMI < 18.5) | Normal Weight (BMI > 18.5 and ≤ 24.9) | Overweight (BMI > 25 and ≤ 29.9) | All Obese (BMI ≥ 30)          | Obese Class I (BMI > 30 and ≤ 34.9) | Obese Class II or III (BMI ≥ 35) |
| No. patients    | 805            | 449                              | 31                       | 185                                   | 233                              | 356                           | 180                                 | 176                              |
| < 100 kg, n (%) | 651 (80.9)     | 447 (99.6)                       | 31 (100.0)               | 185 (100.0)                           | 231 (99.1)                       | 204 (57.3)                    | 144 (80.0)                          | 60 (34.1)                        |
| ≥ 100 kg, n (%) | 154 (19.1)     | 2 (0.4)                          | 0                        | 0                                     | 2 (0.9)                          | 152 (42.7)                    | 36 (20.0)                           | 116 (65.9)                       |

BMI, body mass index.

\* The recommended starting dose of subcutaneous TCZ for adult patients weighing < 100 kg is 162 mg every other week, followed by an increase to every week based on clinical response; for patients weighing ≥ 100 kg, the recommended starting dose is 162 mg every week. The recommended starting dose of intravenous TCZ for all adult patients is 4 mg/kg every 4 weeks followed by an increase to 8 mg/kg every 4 weeks based on clinical response.

**Supplementary Table S5.** TCZ dose at 6 and 12 months after initiation of TCZ in nonobese vs obese patients.

| Outcome                                              | All Initiators<br>[N = 805] | Nonobese<br>(BMI < 30)<br>[n = 449] | Obese<br>(BMI ≥ 30)<br>[n = 356] |
|------------------------------------------------------|-----------------------------|-------------------------------------|----------------------------------|
| All IV TCZ initiators, n (%) <sup>*</sup>            | 739 (91.8)                  | 416 (92.7)                          | 323 (90.7)                       |
| All SC TCZ initiators, n (%) <sup>*</sup>            | 48 (6.0)                    | 23 (5.1)                            | 25 (7.0)                         |
| Dose available at initiation, n                      | 458                         | 247                                 | 211                              |
| Initiated IV TCZ with dose available, n              | 428                         | 231                                 | 197                              |
| Initiated IV TCZ 4 mg/kg, n                          | 243                         | 127                                 | 116                              |
| Dose available at 6 months, n (%) <sup>†</sup>       | 176 (72.4)                  | 85 (66.9)                           | 91 (78.4)                        |
| Increase to 8 mg/kg by 6 months, n (%) <sup>†</sup>  | 110 (45.3)                  | 58 (45.7)                           | 52 (44.8)                        |
| Dose available at 12 months, n (%) <sup>†</sup>      | 151 (62.1)                  | 74 (58.3)                           | 77 (66.4)                        |
| Increase to 8 mg/kg by 12 months, n (%) <sup>†</sup> | 121 (49.8)                  | 61 (48.0)                           | 60 (51.7)                        |
| Initiated IV TCZ 8 mg/kg, n                          | 185                         | 104                                 | 81                               |
| Initiated SC TCZ with dose available, n              | 30                          | 16                                  | 14                               |
| Initiated SC TCZ q2w, n                              | 13                          | 8                                   | 5                                |
| Dose available at 6 months, n (%) <sup>‡</sup>       | 7 (53.8)                    | 6 (75.0)                            | 1 (20.0)                         |
| Increase to qw by 6 months, n (%) <sup>‡</sup>       | 1 (7.7)                     | 0                                   | 1 (20.0)                         |
| Dose available at 12 months, n (%) <sup>‡</sup>      | 9 (69.2)                    | 7 (87.5)                            | 2 (40.0)                         |
| Increase to qw by 12 months, n (%) <sup>‡</sup>      | 0                           | 0                                   | 0                                |
| Initiated SC TCZ qw, n                               | 17                          | 8                                   | 9                                |
| Receiving TCZ at 6 months, n (%) <sup>§</sup>        | 603 (74.9)                  | 342 (76.2)                          | 261 (73.3)                       |
| Receiving IV TCZ with dose available, n              | 509                         | 288                                 | 221                              |
| Receiving IV TCZ 4 mg/kg, n (%) <sup>  </sup>        | 120 (23.6)                  | 61 (21.2)                           | 59 (26.7)                        |
| Receiving IV TCZ 8 mg/kg, n (%) <sup>  </sup>        | 389 (76.4)                  | 227 (78.8)                          | 162 (73.3)                       |
| Receiving SC TCZ with dose available, n              | 41                          | 23                                  | 18                               |
| Receiving SC TCZ q2w, n (%) <sup>  </sup>            | 20 (48.8)                   | 13 (56.5)                           | 7 (38.9)                         |
| Receiving SC TCZ qw, n (%) <sup>  </sup>             | 21 (51.2)                   | 10 (43.5)                           | 11 (61.1)                        |
| Receiving on TCZ at 12 months, n (%) <sup>§</sup>    | 494 (61.4)                  | 287 (63.9)                          | 207 (58.1)                       |
| Receiving IV TCZ with dose available, n              | 429                         | 245                                 | 184                              |
| Receiving IV TCZ 4 mg/kg, n (%) <sup>  </sup>        | 71 (16.6)                   | 39 (15.9)                           | 32 (17.4)                        |
| Receiving IV TCZ 8 mg/kg, n (%) <sup>  </sup>        | 358 (83.4)                  | 206 (84.1)                          | 152 (82.6)                       |
| Receiving SC TCZ with dose available, n              | 33                          | 26                                  | 7                                |
| Receiving SC TCZ q2w, n (%) <sup>  </sup>            | 19 (57.6)                   | 15 (57.7)                           | 4 (57.1)                         |
| Receiving SC TCZ qw, n (%) <sup>  </sup>             | 14 (42.4)                   | 11 (42.3)                           | 3 (42.9)                         |

BMI, body mass index; IV, intravenous; SC, subcutaneous; TCZ, tocilizumab; qw, every week; q2w, every 2 weeks.

<sup>\*</sup> Of patients with available IV/SC information.

<sup>†</sup> Of patients who received IV TCZ 4 mg/kg at initiation.

<sup>‡</sup> Of patients who received SC TCZ q2w at initiation.

<sup>§</sup> Of all patients.

|| Of patients with available dose information.
